# Supplementary material
Source: PubMed Central journal article supplement (PMC8888579)
Supplement: 41422_2022_622_MOESM1_ESM.pdf [file 41422_2022_622_MOESM1_ESM.pdf]

**Fig. S1**

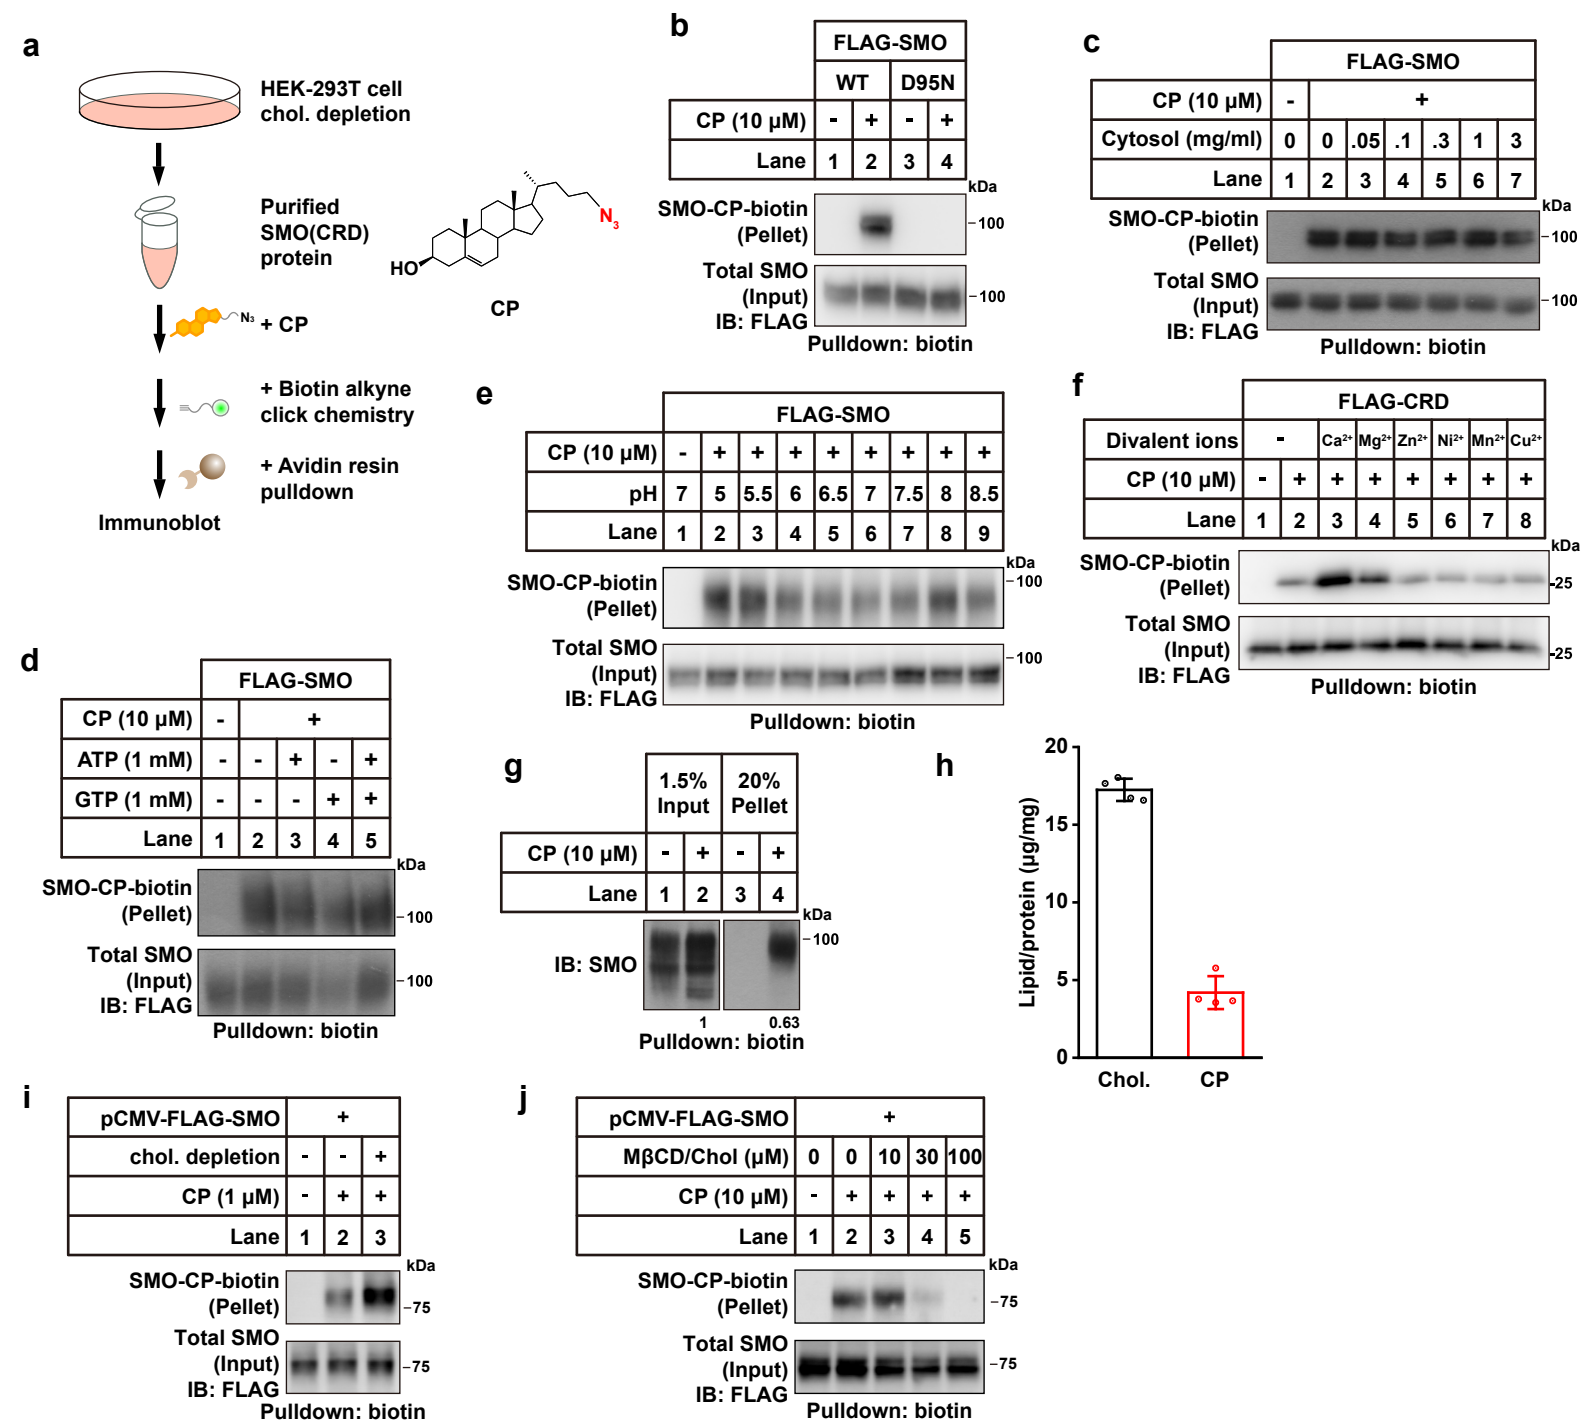

**Fig. S1. Analysis of SMO cholesterylation *in vitro*.**

- a.** Illustration of *in vitro* cholesterylation assay and the structure of CP probe.
- b.** SMO(D95N) mutant is not modified *in vitro*.
- c-e.** Effects of cytosol extract (**c**), ATP/GTP (**d**), or pH (**e**) on the *in vitro* cholesterylation of SMO.
- f.** The effect of divalent ions (2 mM each) on the cholesterol modification of SMO-CRD *in vitro*.  $\text{Ca}^{2+}$ ,  $\text{Mg}^{2+}$ ,  $\text{Zn}^{2+}$  and  $\text{Mn}^{2+}$  were supplied as chloride salts, while  $\text{Ni}^{2+}$  and  $\text{Cu}^{2+}$  were supplied as sulfate salts.
- g.** The percentage of CP-modified SMO in cultured cells. These four lanes were on the same blot. The relative band intensities were quantified and labeled under the blot.
- h.** Quantification of CP and endogenous cholesterol in HEK-293T cells by UPLC-MS/MS. Cells received 16 h of 10  $\mu\text{M}$  CP treatment before lipid extraction.
- i.** Depletion of endogenous cholesterol increased SMO modification by CP probe. HEK-293T cells expressing FLAG-SMO were treated with 1.5% M $\beta$ CD dissolved in DMEM for 30 min at 37 °C and rinsed with PBS. Cells were then incubated in DMEM plus 5% lipoprotein-deficient serum, 1  $\mu\text{M}$  lovastatin and 1  $\mu\text{M}$  CP for 16 h and harvested for cholesterylation assay.
- j.** Exogenous cholesterol competed CP for SMO cholesterylation. HEK-293T cells expressing FLAG-SMO were incubated in complete medium plus 10  $\mu\text{M}$  CP in the presence of M $\beta$ CD-solubilized cholesterol as competitor for 16 h and harvested for cholesterylation assay.
