# Supplementary material
Source: PubMed Central journal article supplement (PMC8888579)
Supplement: 41422_2022_622_MOESM7_ESM.pdf [file 41422_2022_622_MOESM7_ESM.pdf]

**Fig. S7**

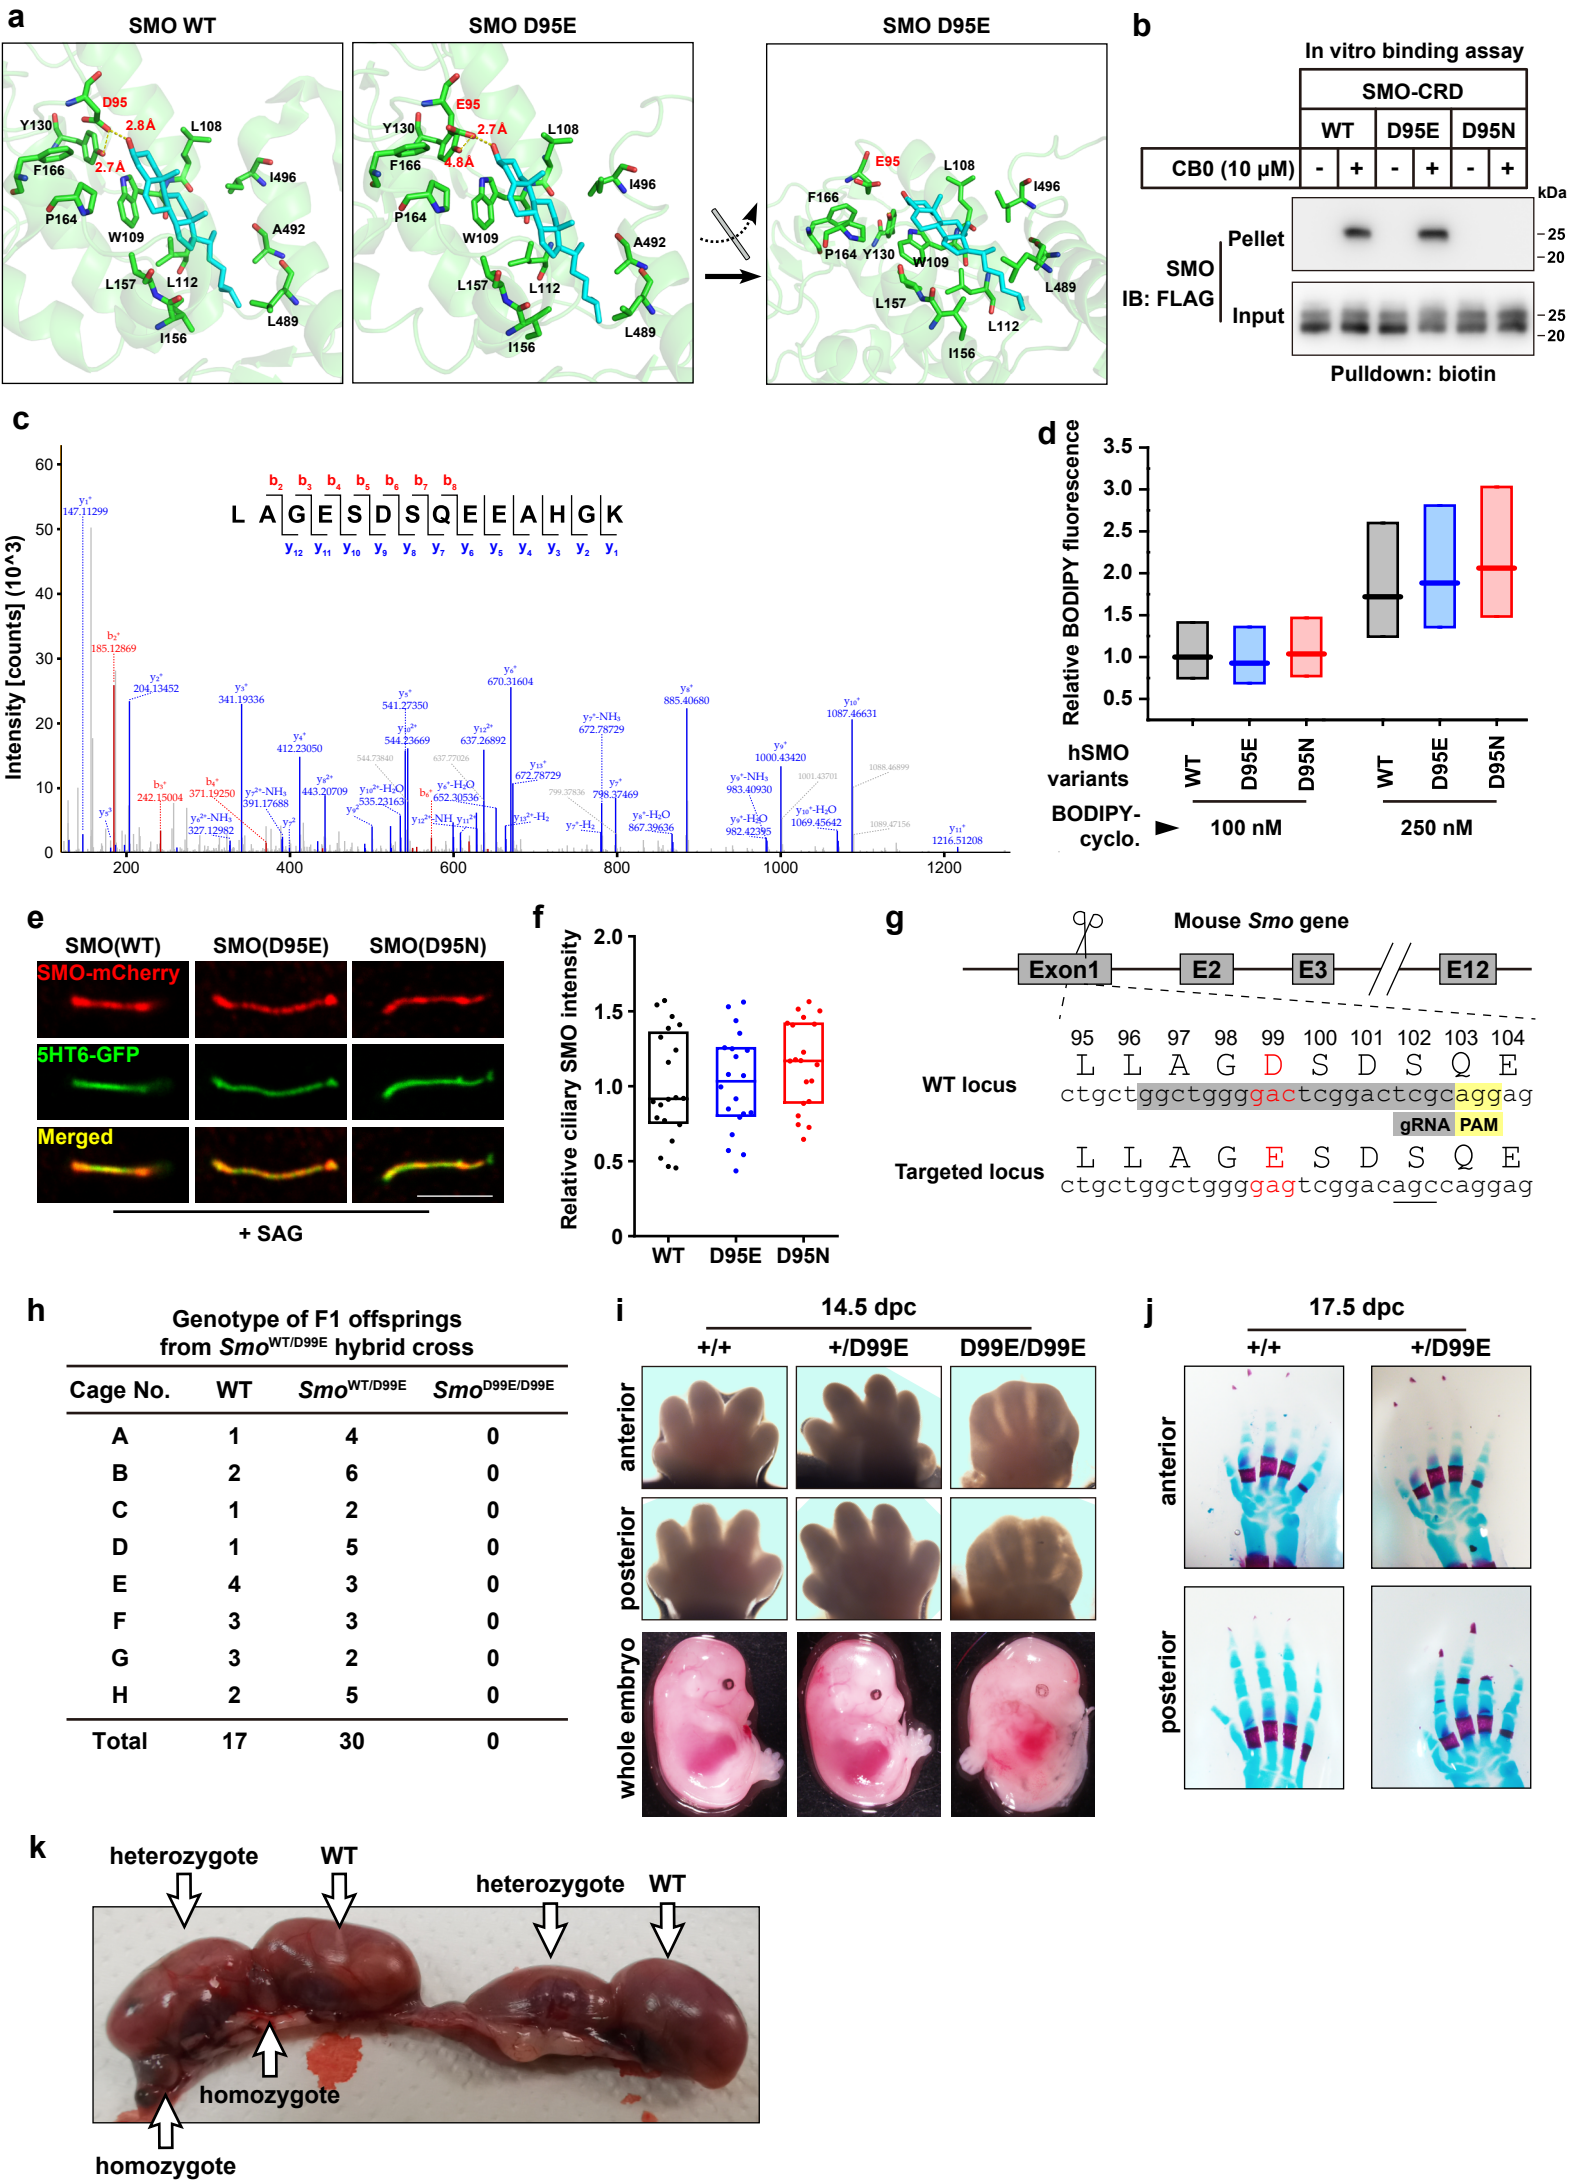

**Fig. S7. Characterization of SMO(D95E).**

- a.** Amino acid substitution simulation of SMO(D95E) to dock cholesterol based on the structure of hSMO-cholesterol complex (PDB: 5L7D).
- b.** *In vitro* binding assay of the purified SMO-CRD variants with CB probe.
- c.** Mass spectrum of CRD(D95E). The parental ion of E95 was successfully detected and shown, while the cross-linked peptide of E95-Y130 was not detected.
- d.** Analysis of BODIPY-cyclopamine binding to SMO variants by flow cytometry. Horizontal lines denoted mean values, and boxes denoted 25<sup>th</sup> (lower limits) and 75<sup>th</sup> quantiles (upper limits).
- e.** SMO variants translocated to primary cilia in response to SAG. NIH3T3 cells expressing mCherry-tagged SMO variants and 5HT6-GFP were treated with 100 nM SAG for 1 hr, and fixed for confocal microscopy. Bar=3  $\mu$ m.
- f.** Quantification of ciliary SMO intensity in e. n=20.
- g.** Strategy to generate *Smo* p.D99E knockin strain by CRISPR-Cas9. A synonymous mutation was introduced at Ser102 to facilitate gene editing and was underlined.
- h.** Genotype of *Smo*<sup>WT/D99E</sup> hybrid cross offsprings from 8 breeding cages.
- i.** Limb and embryo morphologies of 14.5 dpc embryos.
- j.** Alizarin red and alcian blue staining of limb digits of 17.5 dpc embryos.
- k.** The appearance of 17.5 dpc embryos and the corresponding genotypes. Embryonic remnants of homozygous mutants were carefully separated and used for DNA extraction.
