# Supplementary material
Source: PubMed Central journal article supplement (PMC8888579)
Supplement: 41422_2022_622_MOESM8_ESM.pdf [file 41422_2022_622_MOESM8_ESM.pdf]

Fig. S8

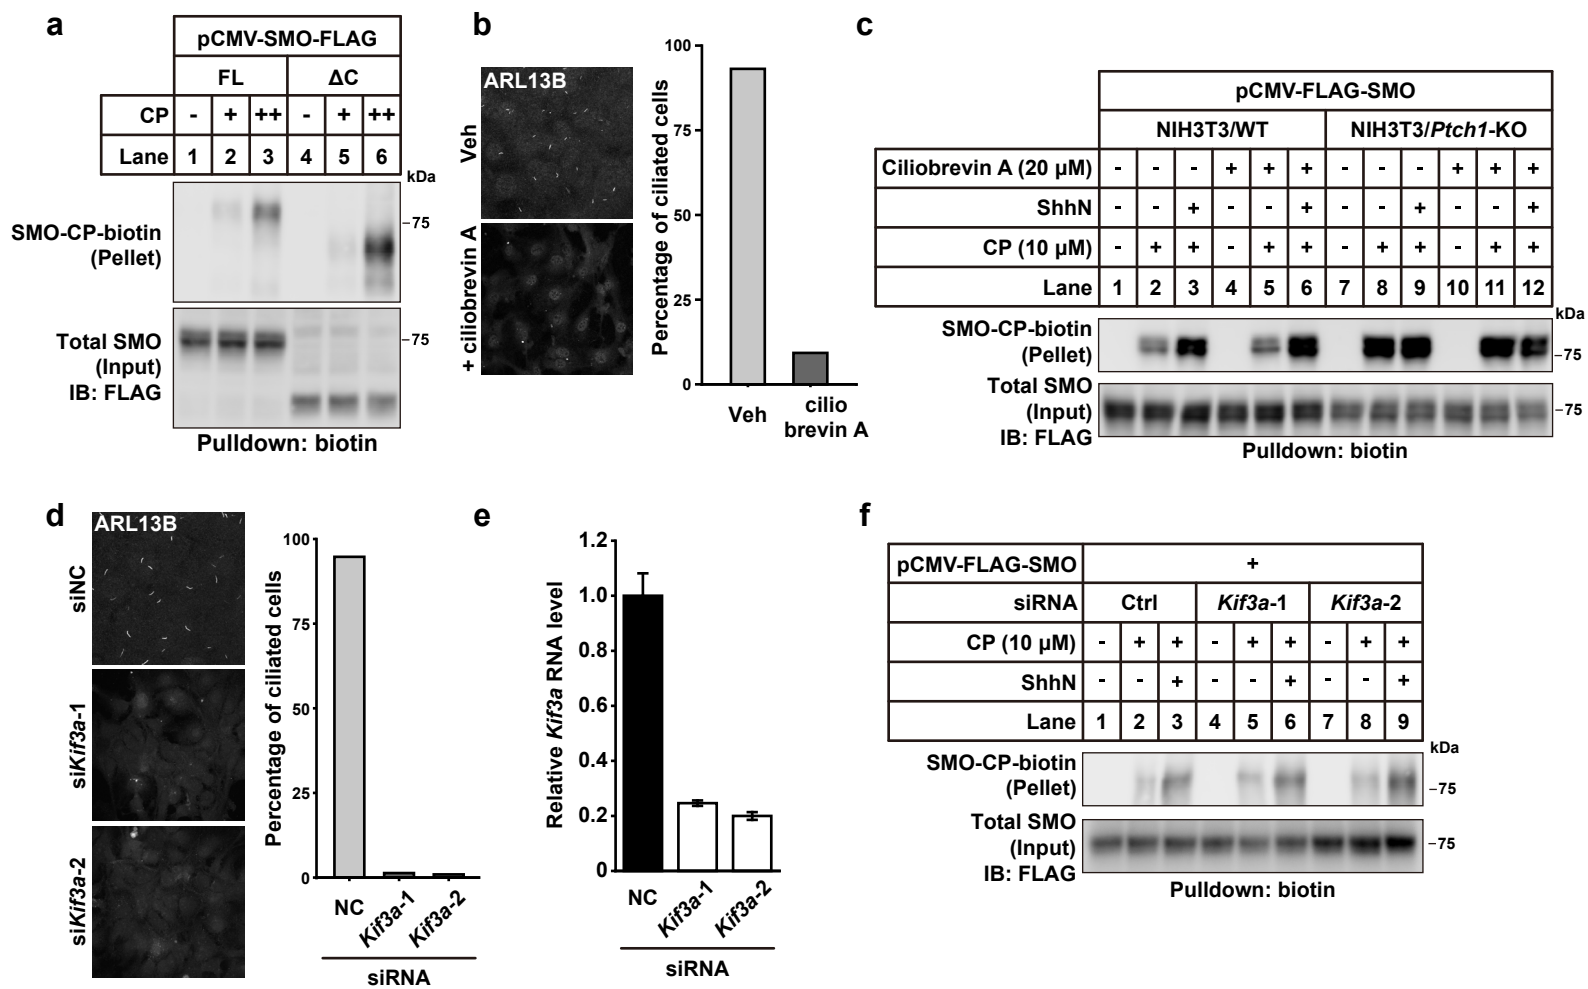

1 **Fig. S8. SMO cholesterylation is independent of the primary cilium.**

2 **a.** Deletion of SMO cytosolic tail (1-586 a.a., designated as SMO $\Delta$ C) which was  
3 required for ciliary translocation did not affect SMO cholesterylation in HEK-293T  
4 cells. The concentrations of CP were 3  $\mu$ M and 10  $\mu$ M, respectively.

5 **b.** Representative confocal images and quantification of ciliated cells upon ciliobrevin  
6 A (20  $\mu$ M, 24 h) treatment. n>150 cells per condition.

7 **c.** Inhibition of ciliogenesis by ciliobrevin A (20  $\mu$ M, 24 h) did not affect SMO  
8 cholesterylation in NIH3T3 cells.

9 **d.** Representative confocal images and quantification of ciliated cells in negative  
10 control (NC)-siRNA or *Kif3a* siRNA-transfected NIH3T3 cells. n>150 cells per  
11 condition.

12 **e.** Knockdown efficiency of *Kif3a* siRNA.

13 **f.** Inhibition of ciliogenesis by *Kif3a* RNAi did not affect SMO cholesterylation in  
14 NIH3T3 cells.

15
