# Supplementary material
Source: PubMed Central journal article supplement (PMC8888579)
Supplement: 41422_2022_622_MOESM9_ESM.pdf [file 41422_2022_622_MOESM9_ESM.pdf]

Guide RNA sequences for Ca<sup>2+</sup> channel screening

| ID of guide | sense oligo                | antisense oligo            |
|-------------|----------------------------|----------------------------|
| control 1   | caccgTTAGTTCGACCACTCCTGAT  | aaacATCAGGAGTGGTCGAACTAAc  |
| control 2   | caccgGTCCTAGATCCTATCGGGAG  | aaacCTCCCGATAGGATCTAGGACc  |
| control 3   | caccgAGGACTATCCGCGGGATTAG  | aaacCTAATCCCGCGGATAGTCCTc  |
| Orai1 1     | caccgGATCGGCCAGAGTTACTCCG  | aaacCGGAGTAACTCTGGCCGATCc  |
| Orai1 2     | caccgTGGCGATGCATGCGCTCGTG  | aaacCACGAGCGCATGCATCGCCAc  |
| Orai1 3     | caccgAAGACGATGAGCAACCCTGG  | aaacCCAGGGTTGCTCATCGTCTTc  |
| Orai2 1     | caccgGGGCATGGATTACCGAGACT  | aaacAGTCTCGGTAATCCATGCCCC  |
| Orai2 2     | caccgAAGCAGGATGCCCAGAACGG  | aaacCCGTTCTGGGCATCCTGCTTc  |
| Orai2 3     | caccgACAGTGCCTGCACCGAATGG  | aaacCCATTGCGGTGCAGGCACTGTc |
| Orai3 1     | caccgGGTACGTGGCTGAGCCCCGG  | aaacCGCGGGCTCAGCCACGTACCc  |
| Orai3 2     | caccgAGATACGTGGAGCTTGCCTG  | aaacCAGGCAAGCTCCACGTATCTc  |
| Orai3 3     | caccgTTGCTCACGGCTTCAATATG  | aaacCATATTGAAGCCGTGAGCAAc  |
| Trpc1 1     | caccgCATCACTTCGTTGGGCGACG  | aaacCGTCGCCAACGAAGTGATGc   |
| Trpc1 2     | caccgTCTTACAGGTGGGCTTACGG  | aaacCCGTAAGCCCACCTGTAAGAc  |
| Trpc1 3     | caccgCTTCTGCTACAAGCGTGGGG  | aaacCCCCACGCTTGTAGCAGAAGc  |
| Trpc2 1     | caccgCAGTCTCACTATCCTCACCC  | aaacGGGTGAGGATAGTGAGACTGc  |
| Trpc2 2     | caccgGAGTGACACCAGGGGCAAAG  | aaacCTTTGCCCTGGTGTCACTCc   |
| Trpc2 3     | caccgAGGGCACATAGATGTTGTTG  | aaacCAACAACATCTATGTGCCCTc  |
| Trpc3 1     | caccgGCAATGCAAAGACTTCGTAG  | aaacCTACGAAGTCTTTGCATTGCc  |
| Trpc3 2     | caccgAGGTGCAATCCAATAGCCGA  | aaacTCGGCTATTGGATTGCACCTc  |
| Trpc3 3     | caccgCCACTGATCAGGTCGTCCGA  | aaacTCCGACGACCTGATCAGTGGc  |
| Trpc4 1     | caccgAACTCCGTGTCTGATCTAGG  | aaacCCTAGATCAGACACGGAGTTc  |
| Trpc4 2     | caccgATTAAGTGCATCGACCCCCT  | aaacAGGGGGTTCGATGCAGTTAATc |
| Trpc4 3     | caccgGGAGTGGATGATATTACCGT  | aaacACGGTAATATCATCCACTCCc  |
| Trpc5 1     | caccgGCTCATTGCCTTATCAAGCG  | aaacCGCTTGATAAGGCAATGAGCc  |
| Trpc5 2     | caccgAGGGAAGCCATCGTACCACA  | aaacTGTGGTACGATGGCTTCCCTc  |
| Trpc5 3     | caccgTGTAACATAGAGATTTAGG   | aaacCCTAAATCTCTATGTTACCAc  |
| Trpc6 1     | caccgCAGATGGGAAGATATTGCG   | aaacCGCAATATCTTCCCCTCTGc   |
| Trpc6 2     | caccgAGGTTATGTACGGATTGTGG  | aaacCCACAATCCGTACATAACCTc  |
| Trpc6 3     | caccgGGAAGAAGGTTAGCTAATCG  | aaacCGATTAGCTAACCTTCTTCCc  |
| Trpc7 1     | caccgTGAGTATGGCAACATAACCAG | aaacCTGGTATGTTGCCATACTCAc  |
| Trpc7 2     | caccgGGAAGGGCTGTACGCCATTG  | aaacCAATGGCGTACAGCCCTTCCc  |
| Trpc7 3     | caccgTGAAGAAAGAGAAGTTGGCG  | aaacCGCCAAGTTCTCTTTCTTCAc  |
| Trpm1 1     | caccgCGGGTACTGGAACCTACTCA  | aaacTGAGTAGGTTCCAGTACCCGc  |
| Trpm1 2     | caccgGAGATGACAATCCATTCTTG  | aaacCAAGAATGGATTGTCATCTC   |
| Trpm1 3     | caccgGGTAGAAGGTGGTCCCTAACG | aaacCGTTAGGACCACCTTCTACCc  |
| Trpm2 1     | caccgCGTGGCCTGTCAGTGTACCG  | aaacCGGTACACTGACAGGCCACGc  |
| Trpm2 2     | caccgGTTTCATCTCAGAGCAAACGA | aaacTCGTTTGCTCTGAGATGAACc  |
| Trpm2 3     | caccgAGGAAGGTAGTGTGTGCGTG  | aaacCACGCACACACTACCTTCTC   |
| Trpm3 1     | caccgAGGCACCGCTAATCCCCGT   | aaacACGGGGATTAGCCGGTGCCTc  |
| Trpm3 2     | caccgTTGGGTTTCGAGTGTACGTGA | aaacTCACGTACACTCGAACCCTAAc |
| Trpm3 3     | caccgACCATAGGTATCGCCCCCTG  | aaacCAGGGGGCGATACCTATGGTc  |
| Trpm4 1     | caccgGGTAACTGACCACATTACCC  | aaacGGGTAATGTGGTCAGTTACCc  |
| Trpm4 2     | caccgGCAGAATAGTTATAGTCCAG  | aaacCTGGACTATAACTATTCTGCc  |
| Trpm4 3     | caccgAGTGATGGCTCGCCTAGAGT  | aaacACTCTAGGCGAGCCATCACTc  |
| Trpm5 1     | caccgAGAGTGCTACGGCAACAGTG  | aaacCACTGTTGCCGTAGCACTCTc  |
| Trpm5 2     | caccgCAAGAGTGAATCTTCAATG   | aaacCATTGAAGATTTCACTCTTGc  |
| Trpm5 3     | caccgGCTGCAGAATCGTTATGAGA  | aaacTCTCATAACGATTCTGCAGCc  |

|          |                            |                            |
|----------|----------------------------|----------------------------|
| Trpm6 1  | caccgAGAGTGCATACAGTTTAGCG  | aaacCGCTAAACTGTATGCACTCTc  |
| Trpm6 2  | caccgTGTAACAGTTATGGCCGAG   | aaacCTCGGCCATAACTGTTGACAc  |
| Trpm6 3  | caccgAGGTCATGATGTAGCGATAG  | aaacCTATCGCTACATCATGACCTc  |
| Trpm7 1  | caccgTCCAGGGTAATCTCCCCCG   | aaacCGGGGGGAGATTACCCTGGAc  |
| Trpm7 2  | caccgAAAACATATAGACATACCTCA | aaacTGAGGTATGTCTATAGTTTTc  |
| Trpm7 3  | caccgAGATGCTCATCAAATGACGA  | aaacTCGTCATTTGATGAGCATCTc  |
| Trpm8 1  | caccgCAAAAGCAAGATCCCTTGTG  | aaacCACAAGGGATCTTGCTTTTGc  |
| Trpm8 2  | caccgCTCACCTTTGTACAGCGCAT  | aaacATGCGCTGTACAAAGGTGAGc  |
| Trpm8 3  | caccgCCTGATGAAGTACATAGGCG  | aaacCGCCTATGTACTTCATCAGGc  |
| Trpv1 1  | caccgTAAGCTGAATAACACCGTTG  | aaacCAACGGTGTATTTCAGCTTAc  |
| Trpv1 2  | caccgAAGCCACATACTCCTTGCGA  | aaacTCGCAAGGAGTATGTGGCTTc  |
| Trpv1 3  | caccgCCTGCGATCATAGAGCCTTG  | aaacCAAGGCTCTATGATCGCAGGc  |
| Trpv2 1  | caccgTGCACCGATGAGTTCTACCG  | aaacCGGTAGAACTCATCGGTGCAc  |
| Trpv2 2  | caccgCCGTGACCGACTCTTCAGTG  | aaacCACTGAAGAGTCGGTCACGGc  |
| Trpv2 3  | caccgTGACAGCCTTCTCAAATGG   | aaacCCATTGGAGAAGGCTGTCAc   |
| Trpv3 1  | caccgCGTCAATGCTCACGCCAAGG  | aaacCCTTGGCGTGAGCATTGACGc  |
| Trpv3 2  | caccgCACCAATGTAGACACAACGA  | aaacTCGTTGTGTCTACATTGGTGc  |
| Trpv3 3  | caccgAGGATTTGAGCCCAACCCCA  | aaacTGGGGTTGGGCTCAAATCCTc  |
| Trpv4 1  | caccgTCAGCACATCATCCGACGTG  | aaacCACGTCGGATGATGTGCTGAc  |
| Trpv4 2  | caccgGGTGTACAACAGCAAGATCG  | aaacCGATCTTGCTGTTGTACACCc  |
| Trpv4 3  | caccgCTCACAAGAAAGCTGACATG  | aaacCATGTCAGCTTTCTTGTGAGc  |
| Trpv5 1  | caccgTGTTTGTCAAAGTAGCGAG   | aaacCTCGCTACTTTGGACAAACAc  |
| Trpv5 2  | caccgAGAAACGGGAAGCGCATCCAG | aaacCTGGATGCGCTTCCGTTTCTc  |
| Trpv5 3  | caccgGTGTGAACCTTCGATGGAAGG | aaacCCTTCCATCGAAGTTCACACc  |
| Trpv6 1  | caccgTTTGACAGACCATTCTCGG   | aaacCCGAGAATGGTCTGTCCAAAc  |
| Trpv6 2  | caccgGCTCAAGTTGAAGGATGTG   | aaacCACATCCTTCAAACCTGAGCc  |
| Trpv6 3  | caccgTGTTACTACCAAGAAACGGG  | aaacCCCGTTTCTTGGTAGTAACAc  |
| Trpal 1  | caccgTCTGAGCGGTACCTTTACAG  | aaacCTGTAAAGGTACCGCTCAGAc  |
| Trpal 2  | caccgCAAAAAAGTAGCACCTACCC  | aaacGGGTAGGTGCTACTTTTTTGc  |
| Trpal 3  | caccgTGGGTACTCAGACCATGA    | aaacTCATGGTCTGAGGTACCCAc   |
| Meoln1 1 | caccgGACATAGGCATACCGCCCA   | aaacTGGGCCGGTATGCCTATGTCCc |
| Meoln1 2 | caccgTTTGACAATAAAGCGCACAG  | aaacCTGTGCGCTTTATTGTCAAAc  |
| Meoln1 3 | caccgATACCTTTGACATTGATCCA  | aaacTGGATCAATGTCAAAGGTATc  |
| Meoln2 1 | caccgACGGGATCTGACGTCTGGCT  | aaacAGCCAGACGTCAGATCCCGTc  |
| Meoln2 2 | caccgTTTCCACGGGATCTGACGTC  | aaacGACGTCAGATCCCGTGAAAACc |
| Meoln2 3 | caccgGATGGCGTCTCTCGATTCTG  | aaacCAGAATCGAGAGACGCCATCc  |
| Meoln3 1 | caccgAAGACCCTAATCACAGACC   | aaacGGTCTGTGATTAGGGTCTTc   |
| Meoln3 2 | caccgTAAGAGAAGCTGCTCTGACG  | aaacCGTCAGAGCAGCTTCTCTTAc  |
| Meoln3 3 | caccgACAGATTCTGAAAATCGCGA  | aaacTCGCGATTTTCAGAATCTGTc  |
| Pkd1 1   | caccgATTCCCGTACCGATATACCT  | aaacAGGTATATCGGTACGGGAATc  |
| Pkd1 2   | caccgACAGTTGCGTAGATCAACAT  | aaacATGTTGATCTACGCAACTGTc  |
| Pkd1 3   | caccgAGCTCGCAGACATAACTATG  | aaacCATAGTTATGTCTGCGAGCTc  |
| Pkd2 1   | caccgGGGATCATTGCGTCGTACAG  | aaacCTGTACGACGCAATGATCCCc  |
| Pkd2 2   | caccgTGCTGGAGCAGGACGAAAG   | aaacCTTTCGTCCTGCTCCAGGCAc  |
| Pkd2 3   | caccgTTCGGTTGTCAGCTTGGCTG  | aaacCACGCAAGCTGACAACCGAAc  |
| Pkd113 1 | caccgGCGACTTCTTCATCGTGCCG  | aaacCGGCACGATGAAGAAGTCGCc  |
| Pkd113 2 | caccgAAGTGGAGCGTCATTAGGAG  | aaacCTCCTAATGACGCTCCACTTc  |
| Pkd113 3 | caccgGCTGACGAGCAGCTCCGACA  | aaacTGTCGGAGCTGCTCGTCAGCc  |
| Pkd211 1 | caccgTCAGTACAATAACATGAACG  | aaacCGTTCATGTTATTGTACTGAc  |
| Pkd211 2 | caccgCGTGCGCAATGACTCCTGTG  | aaacCACAGGAGTCATTGCGCAGCc  |

|          |                           |                           |
|----------|---------------------------|---------------------------|
| Pkd211 3 | caccgCACACAGACAGATGTCCACG | aaacCGTGGACATCTGTCTGTGTGc |
|----------|---------------------------|---------------------------|

shRNA sequences for target genes, referring to Fig. S4e

Trpm5 ccggGGAAGAAGCGAGGCAAGTTTGctcgagCAAACCTGCCTCGCTTCTTCCttttg  
Trpm6 ccggGGGCATGTATGAAAATGAAGAactcgagTCTTCATTTCCATACATGCCCTttttg  
Trpc1 ccggGCTCATTGCCATTGAGAATGAactcgagTCATTCTCAATGGCAATGAGCttttg  
P2rx1 ccggGCTGTCAGCCTTCTTCTTTGAactcgagTCAAAGAAGAAGGCTGACAGCttttg
